# Supplementary material for: Contribution of Hypothyroidism to Cognitive Impairment and Hippocampal Synaptic Plasticity Regulation in an Animal Model of Depression
Source: MDPI journal article supplement (doi:10.3390/ijms22041599), 2021-02-05
Supplement: s1 [file s1]

## GluN1

The membranes were cut after transfer at 75kDa to allow for simultaneous incubation with the antibody against  $\beta$ -actin

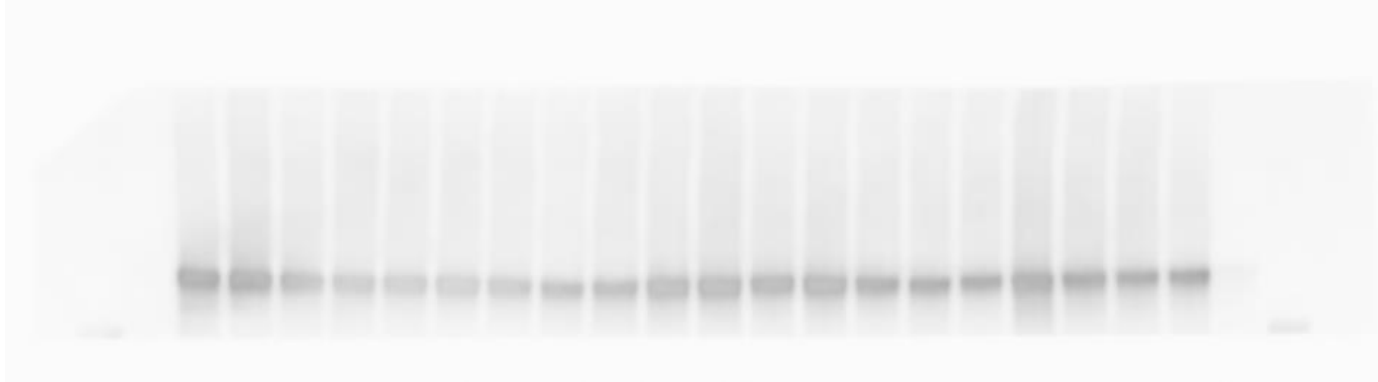

The bands from the left: Wistar, WKY, Wistar PTU, WKY PTU, Wistar, WKY, Wistar PTU, WKY PTU

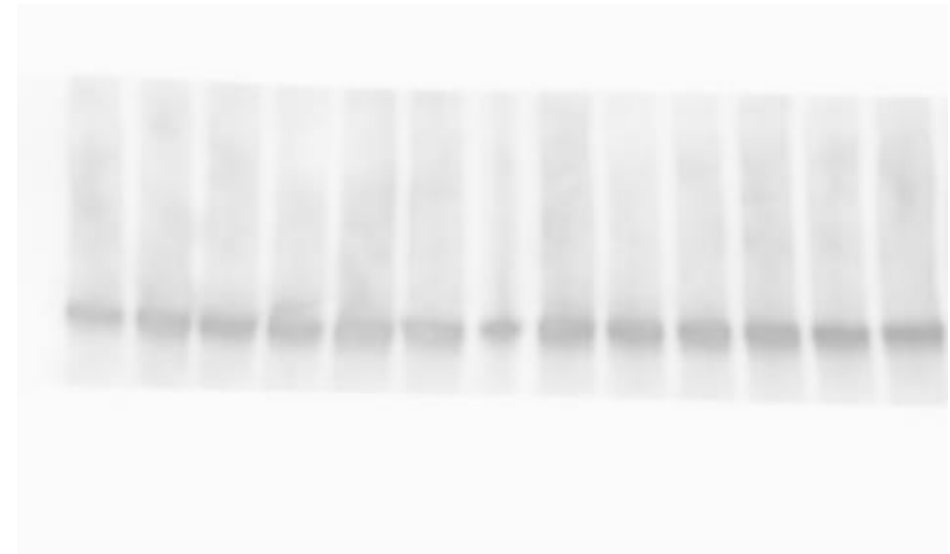

The bands from the left: Wistar, WKY, Wistar PTU, WKY PTU, Wistar, WKY, Wistar PTU, WKY PTU, Wistar, WKY, Wistar PTU, WKY PTU, Wistar

$\beta$ -actin (as loading control) to GluN1

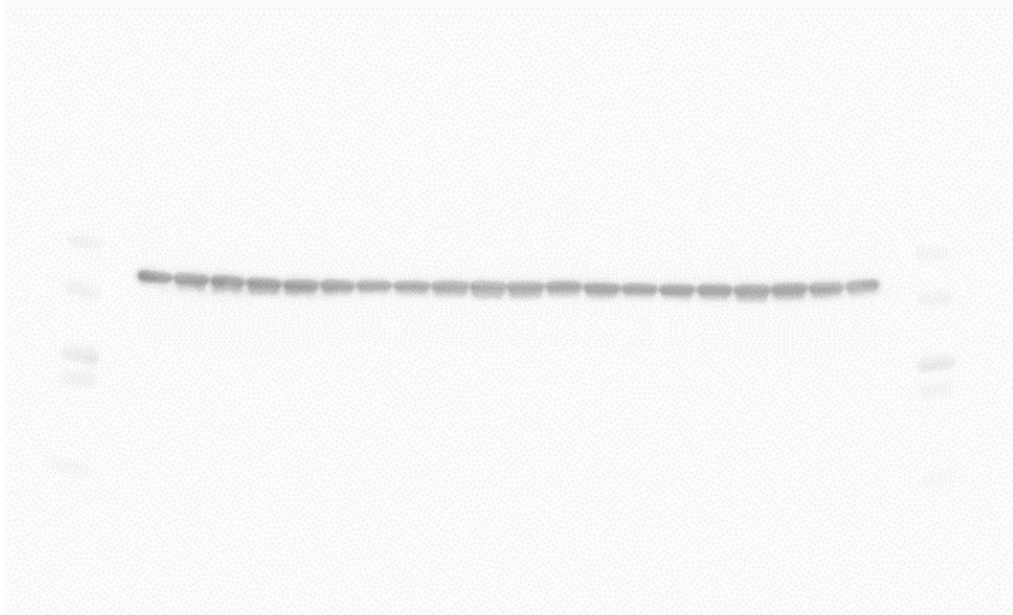

The bands from the left: Wistar, WKY, Wistar PTU, WKY PTU, Wistar, WKY, Wistar PTU, WKY PTU, Wistar, WKY, Wistar PTU, WKY PTU, Wistar, WKY, Wistar PTU, WKY PTU

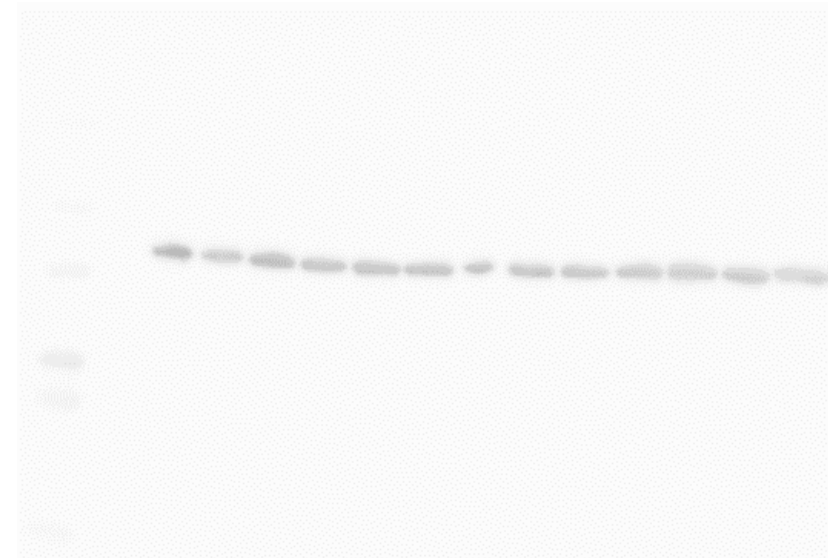

The bands from the left: Wistar, WKY, Wistar PTU, WKY PTU, Wistar, WKY, Wistar PTU, WKY PTU, Wistar, WKY, Wistar PTU, WKY PTU, Wistar

## GluN2A

The membranes were cut after transfer at 75kDa to allow for simultaneous incubation with the antibody against  $\beta$ -actin

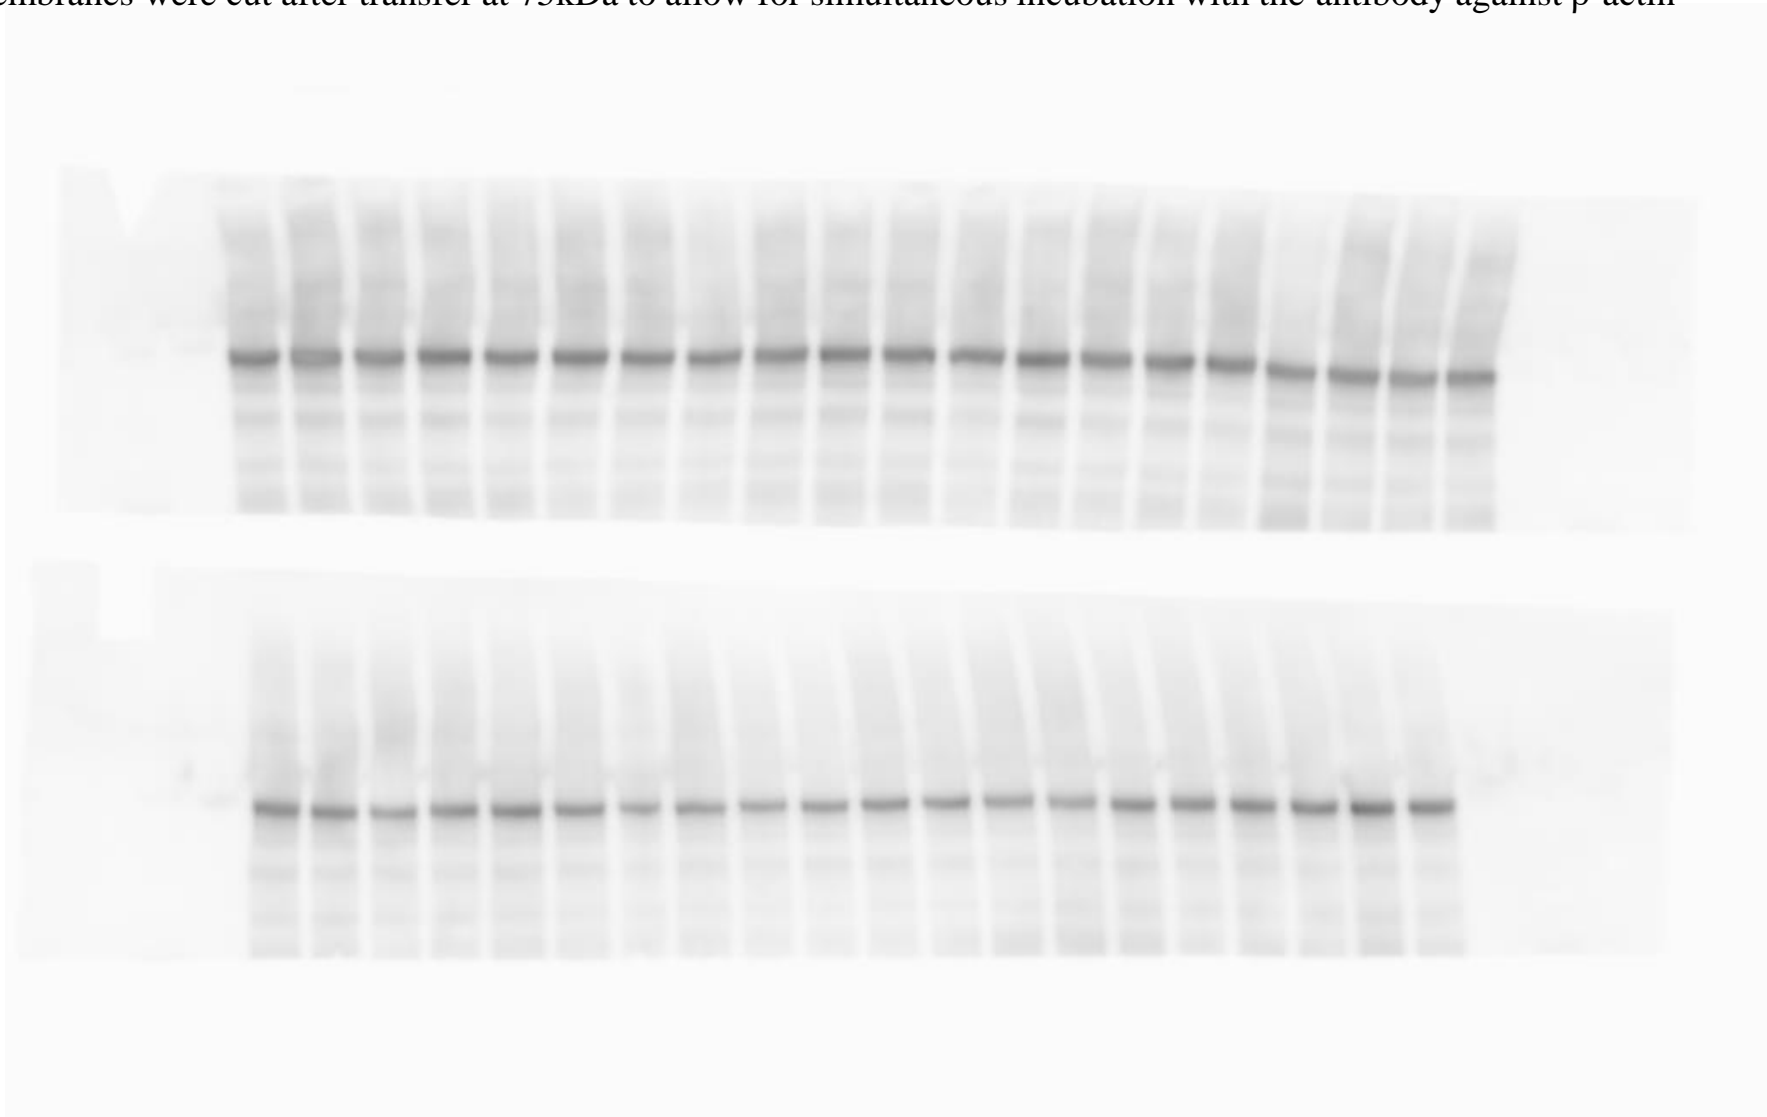

The bands from the left: Wistar, WKY, Wistar PTU, WKY PTU, Wistar, WKY, Wistar PTU, WKY PTU, Wistar, WKY, Wistar PTU, WKY PTU, Wistar, WKY, Wistar PTU, WKY PTU

# $\beta$ -actin (as loading control) to GluN2A

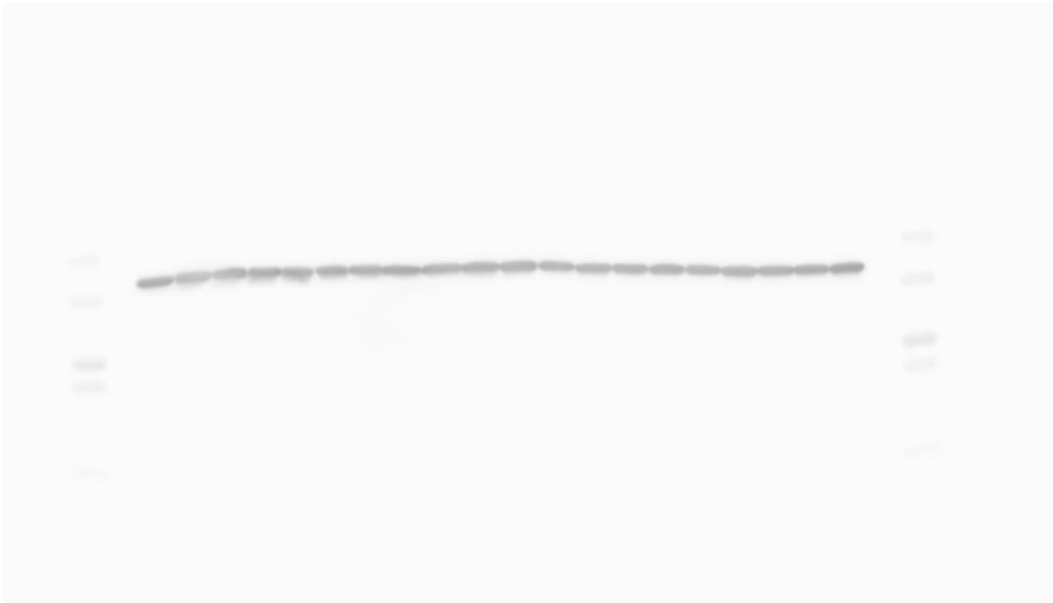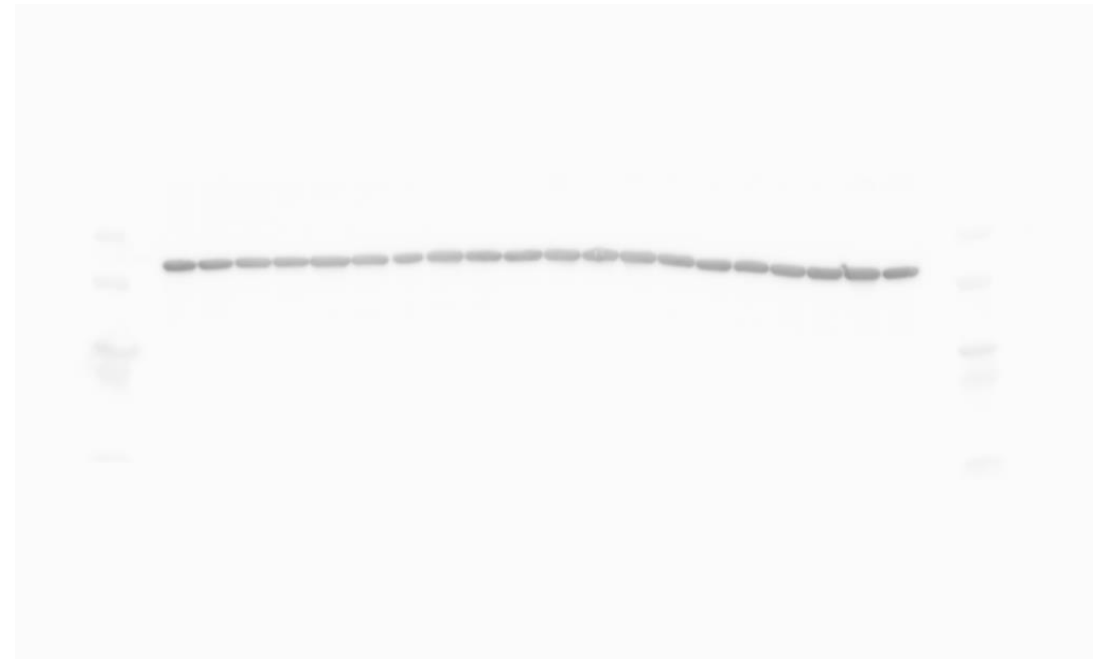

The bands from the left: Wistar, WKY, Wistar PTU, WKY PTU, Wistar, WKY, Wistar PTU, WKY PTU, Wistar, WKY, Wistar PTU, WKY PTU, Wistar, WKY, Wistar PTU, WKY PTU

## GluN2B

The membranes were cut after transfer at 75kDa to allow for simultaneous incubation with the antibody against  $\beta$ -actin

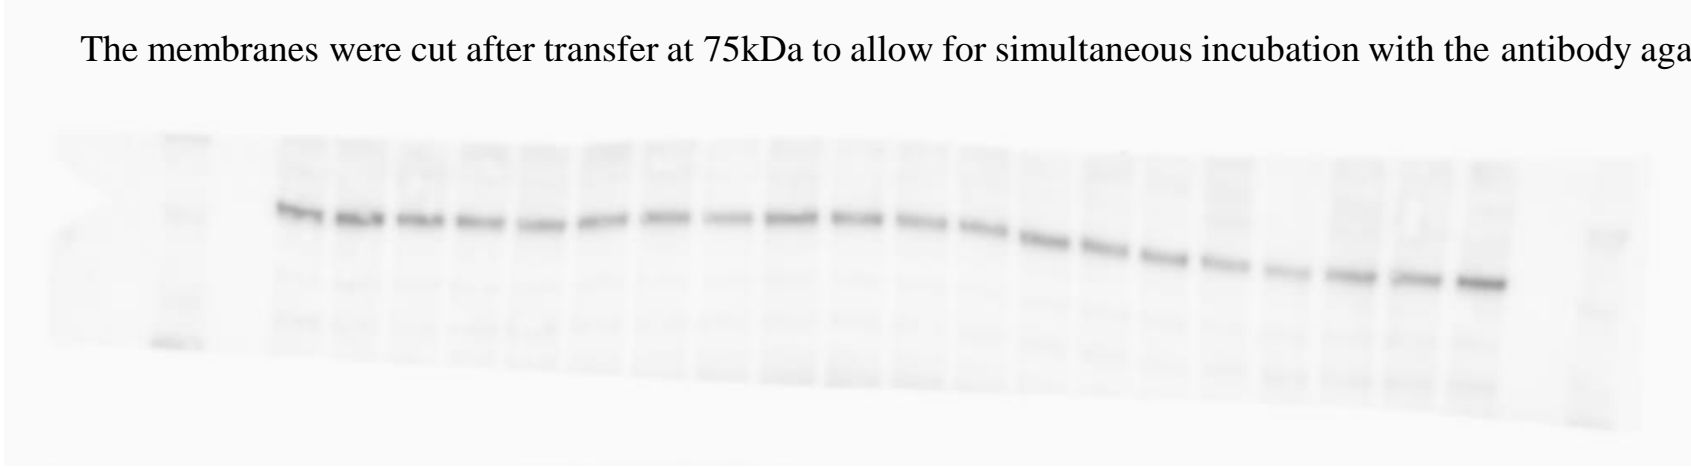

The bands from the left: Wistar, WKY, Wistar PTU, WKY PTU, Wistar, WKY, Wistar PTU, WKY PTU

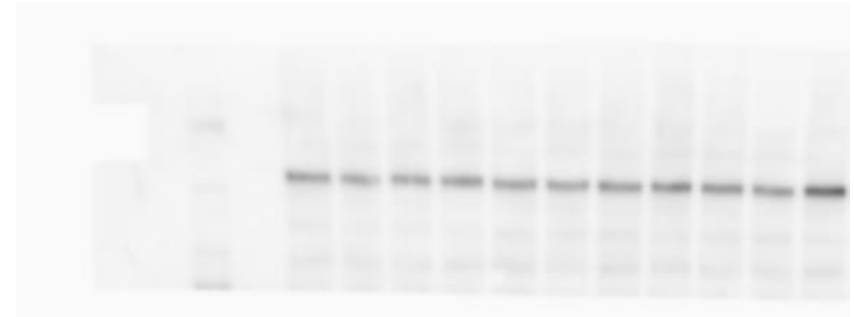

The bands from the left: Wistar, WKY, Wistar PTU, WKY PTU, Wistar, WKY, Wistar PTU, WKY PTU, Wistar, WKY, Wistar PTU

$\beta$ -actin (as loading control) to GluN2B

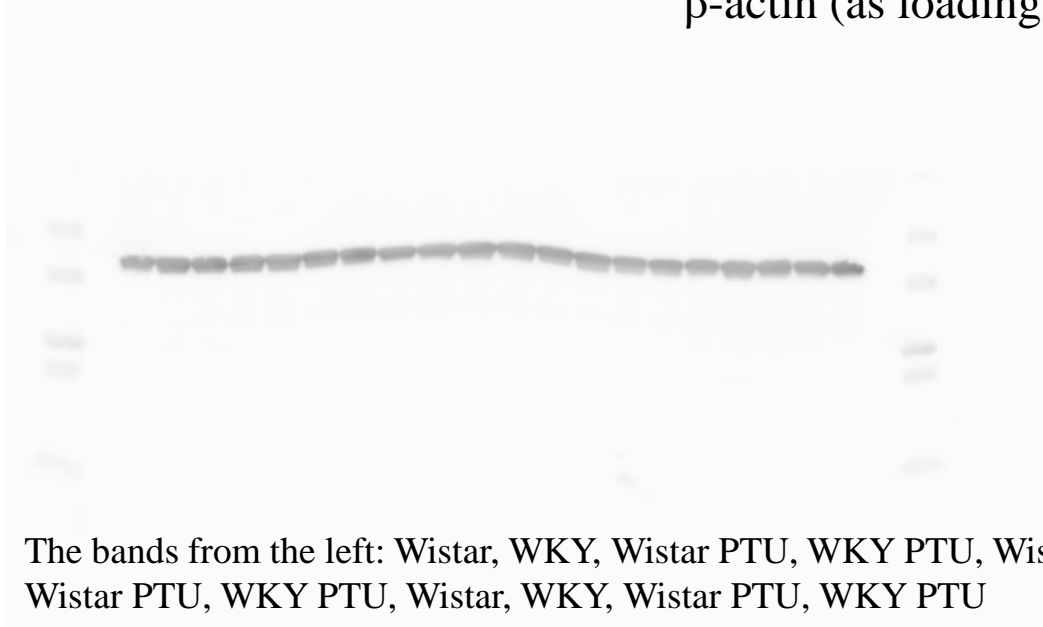

The bands from the left: Wistar, WKY, Wistar PTU, WKY PTU, Wistar, WKY, Wistar PTU, WKY PTU, Wistar, WKY, Wistar PTU, WKY PTU, Wistar, WKY, Wistar PTU, WKY PTU

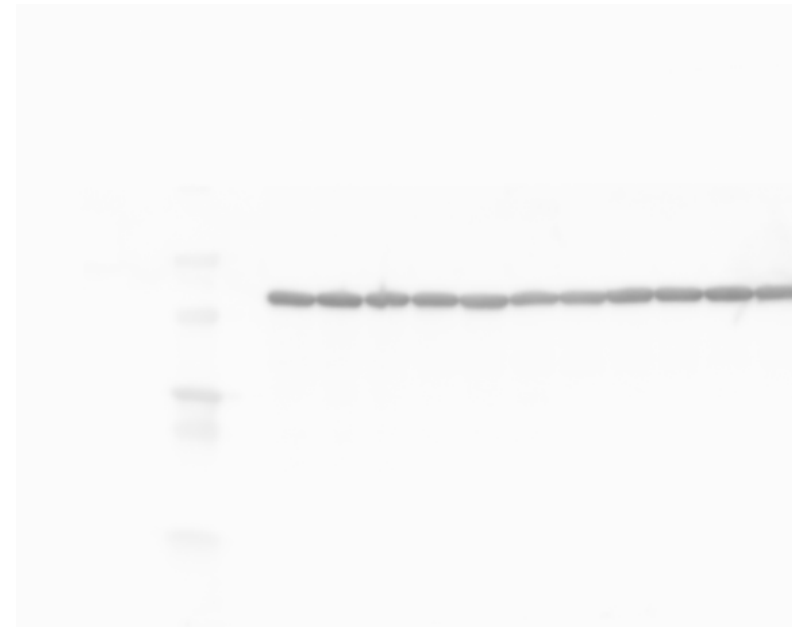

The bands from the left: Wistar, WKY, Wistar PTU, WKY PTU, Wistar, WKY, Wistar PTU, WKY PTU, Wistar, WKY, Wistar PTU

## caspase-1

The membranes were cut after transfer to allow for simultaneous incubation with the antibody against Vinculin (loading control)

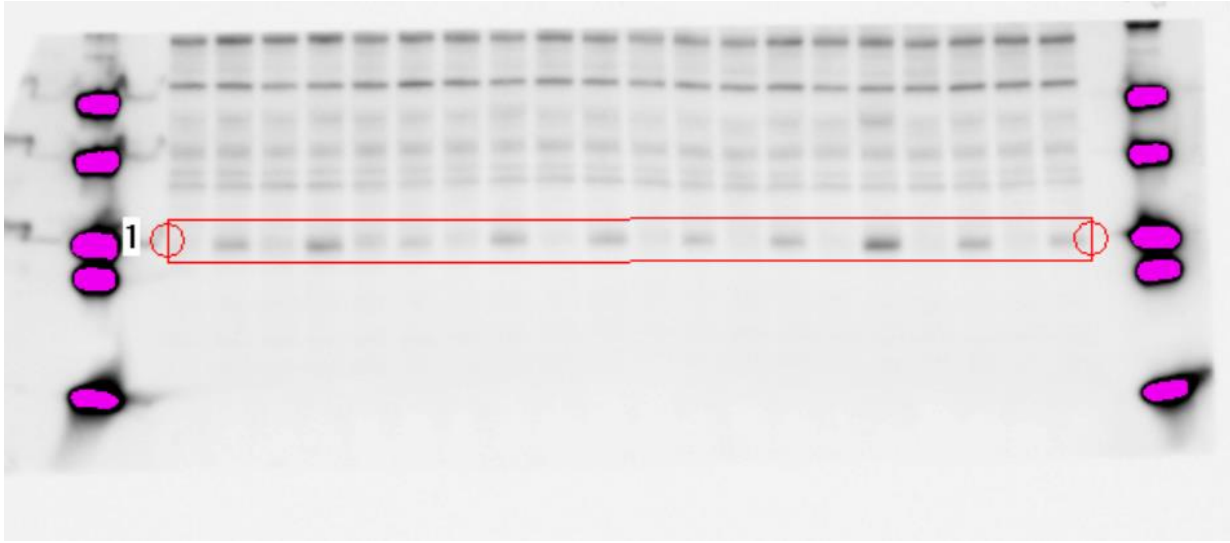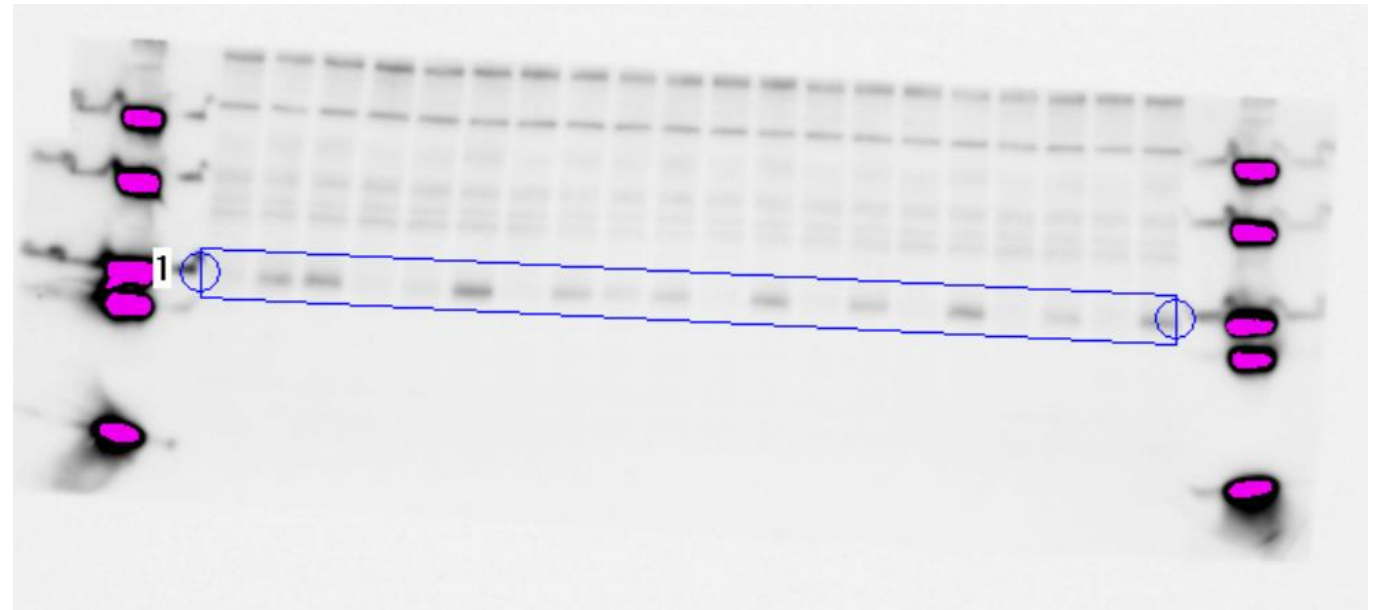

## Vinculin (as loading control) to caspase-1

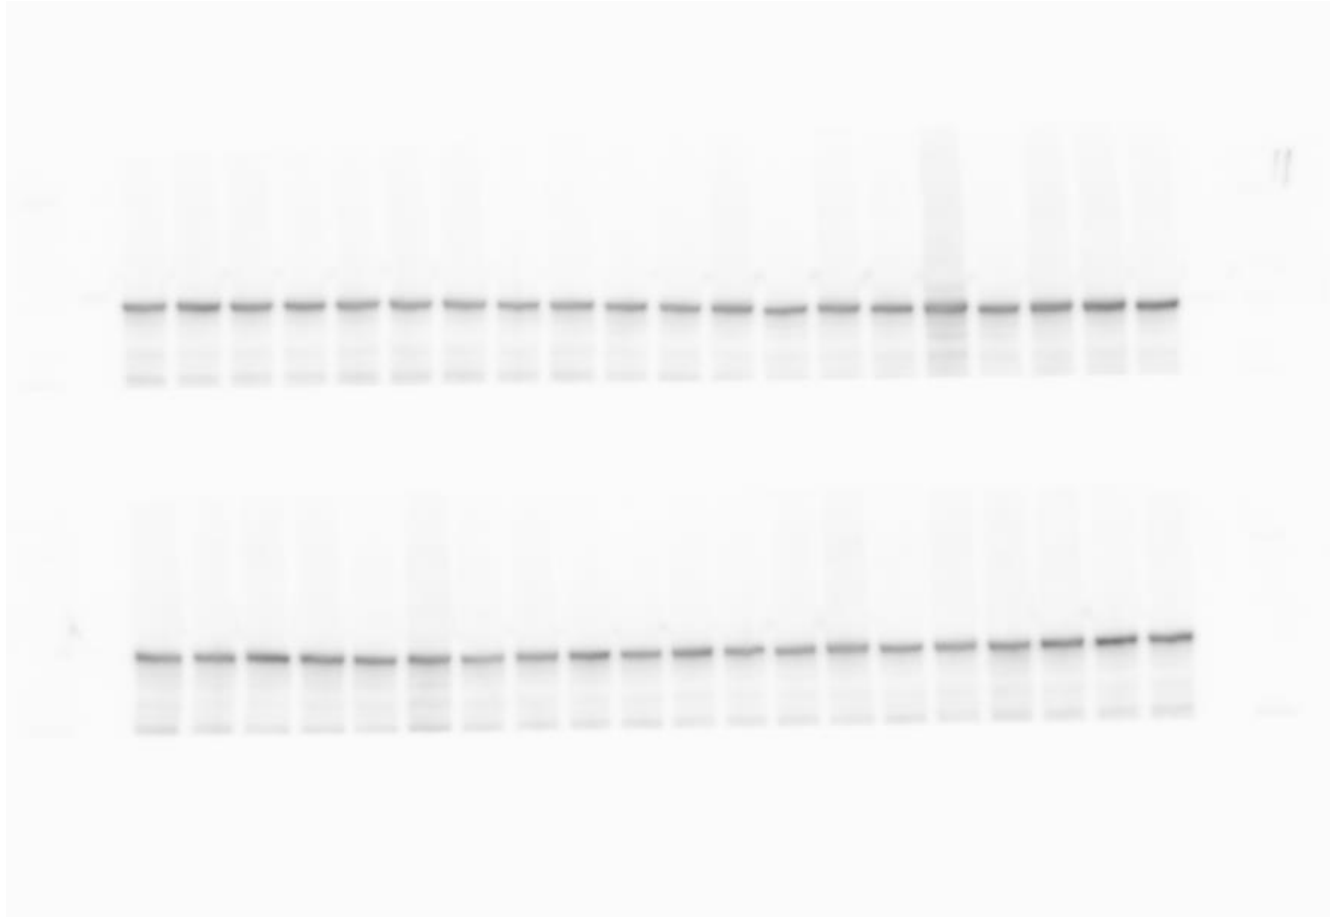

The bands from the left: Wistar, WKY, Wistar PTU, WKY PTU, Wistar, WKY, Wistar PTU, WKY PTU, Wistar, WKY, Wistar PTU, WKY PTU, Wistar, WKY, Wistar PTU, WKY PTU



p-CaMKII

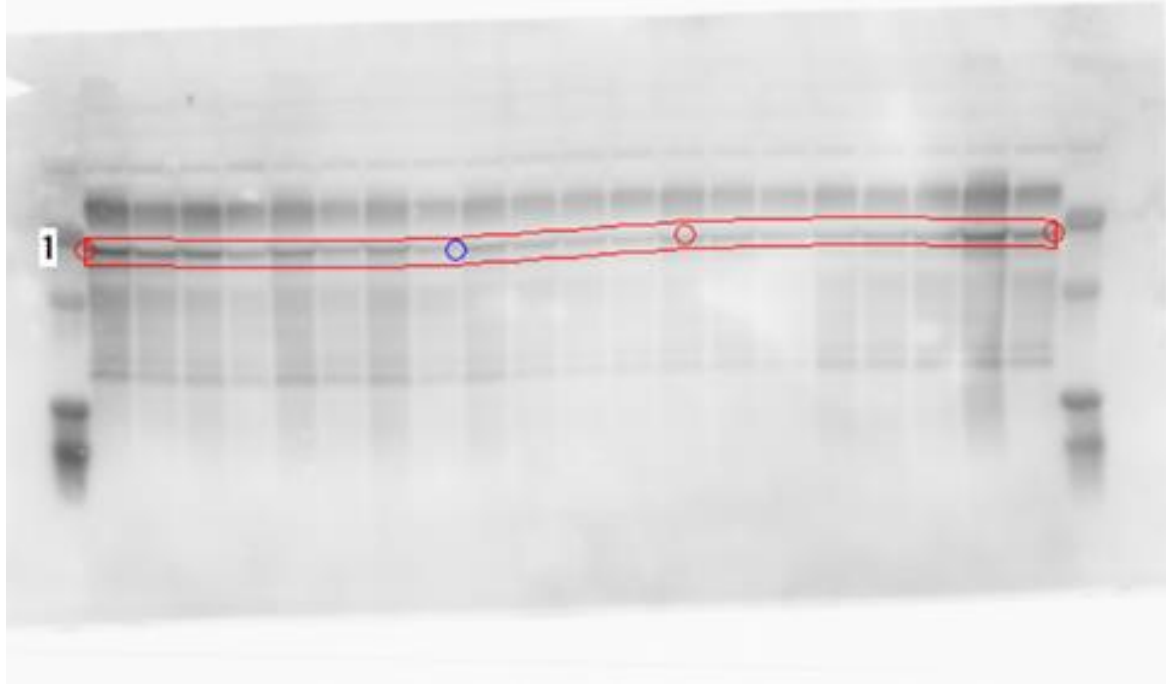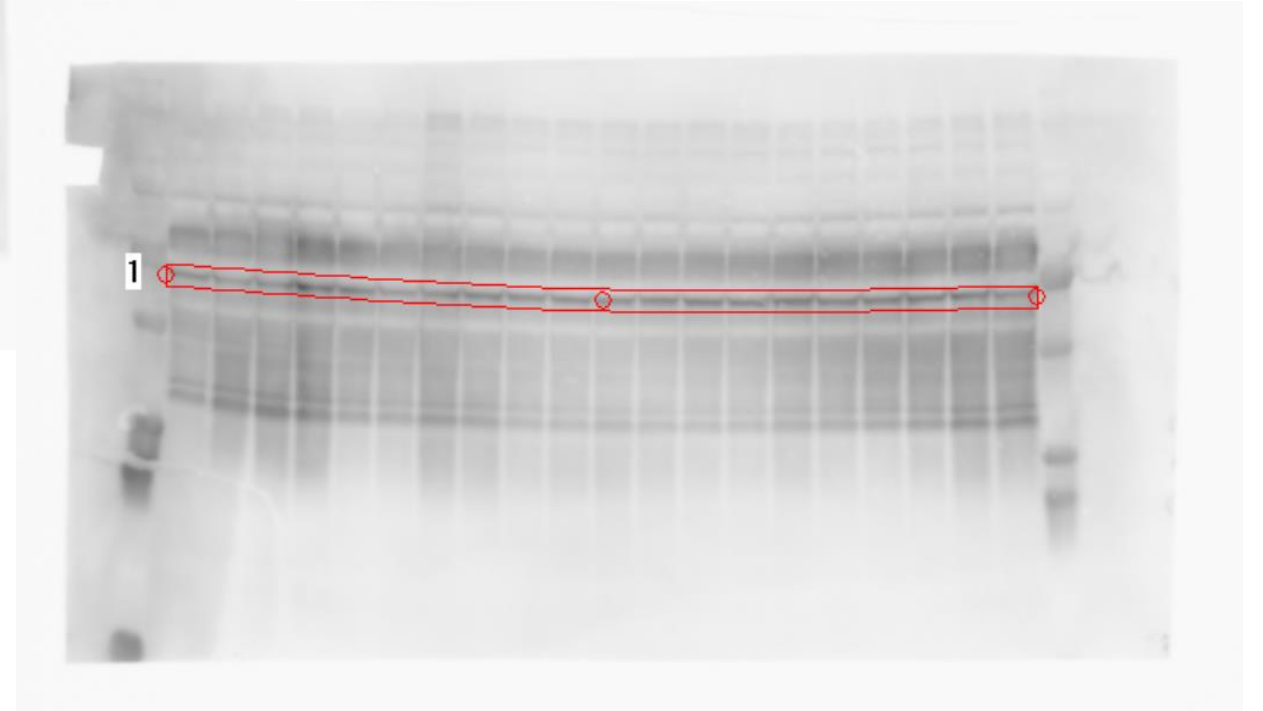

The bands from the left: Wistar, WKY, Wistar PTU, WKY PTU, Wistar, WKY, Wistar PTU, WKY PTU, Wistar, WKY, Wistar PTU, WKY PTU, Wistar, WKY, Wistar PTU, WKY PTU

CaMKII

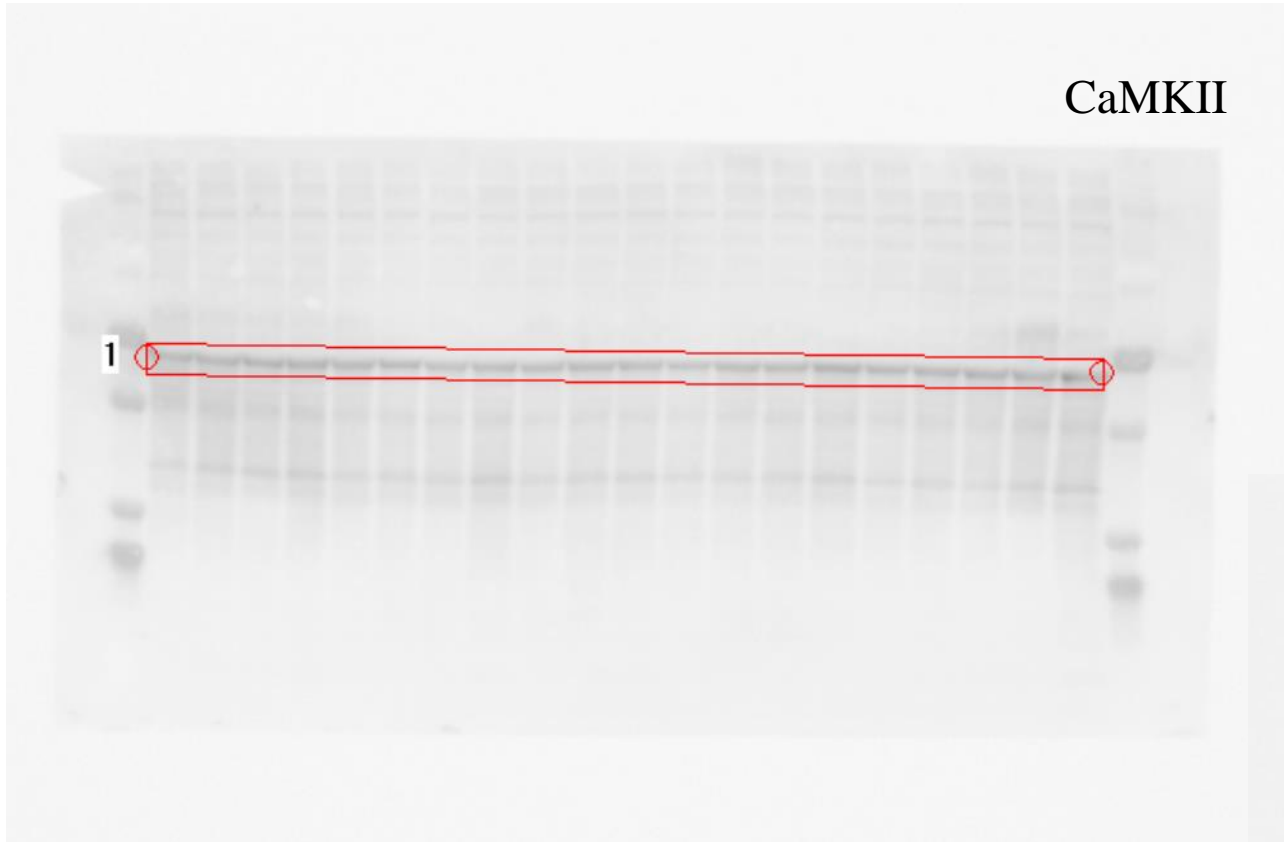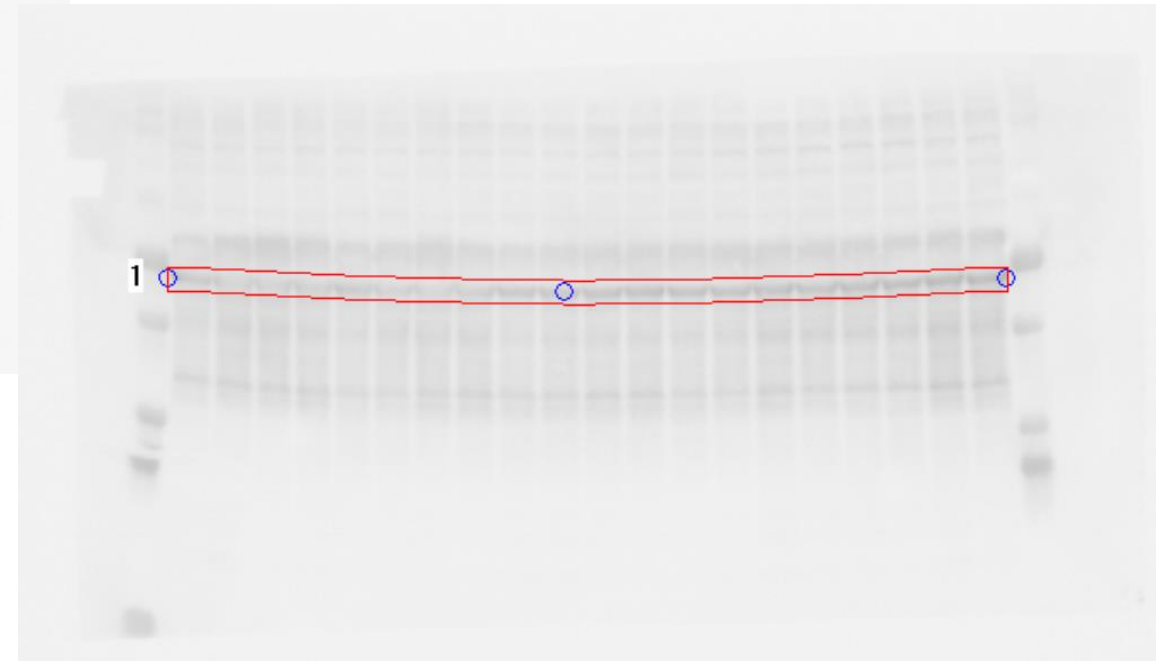

The bands from the left: Wistar, WKY, Wistar PTU, WKY PTU, Wistar, WKY, Wistar PTU, WKY PTU, Wistar, WKY, Wistar PTU, WKY PTU, Wistar, WKY, Wistar PTU, WKY PTU

$\beta$ -actin (as loading control) to p-CaMKII and CaMKII proteins

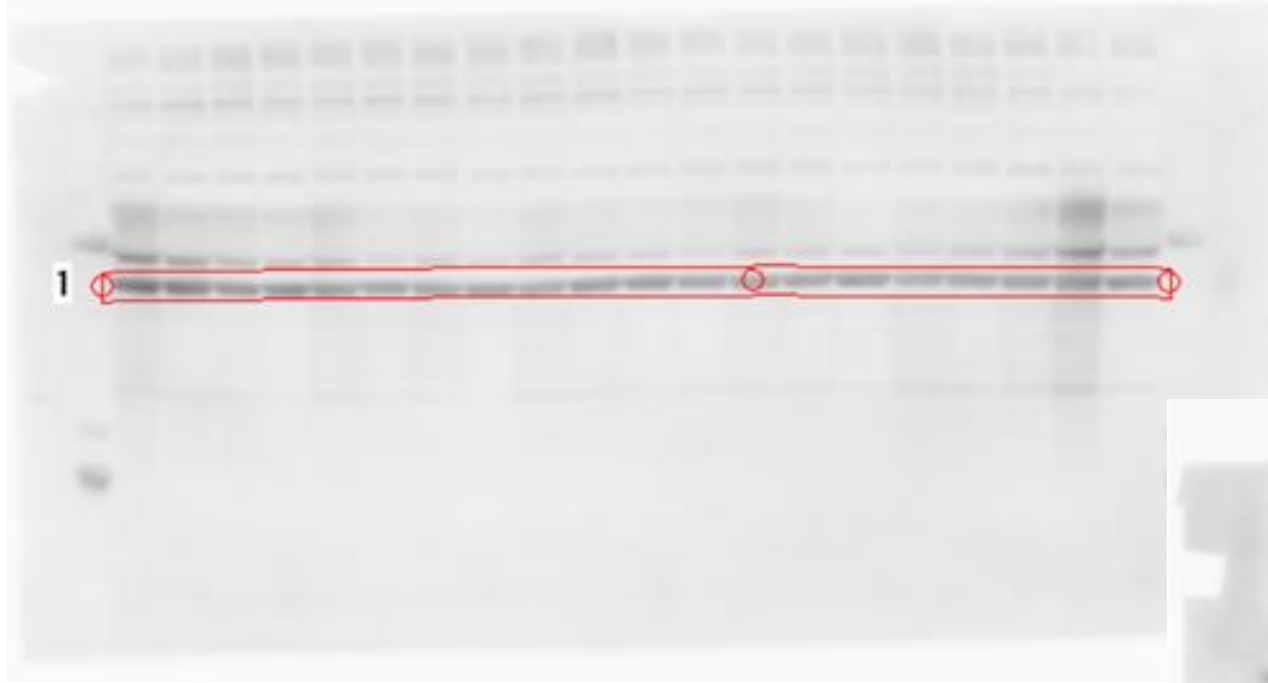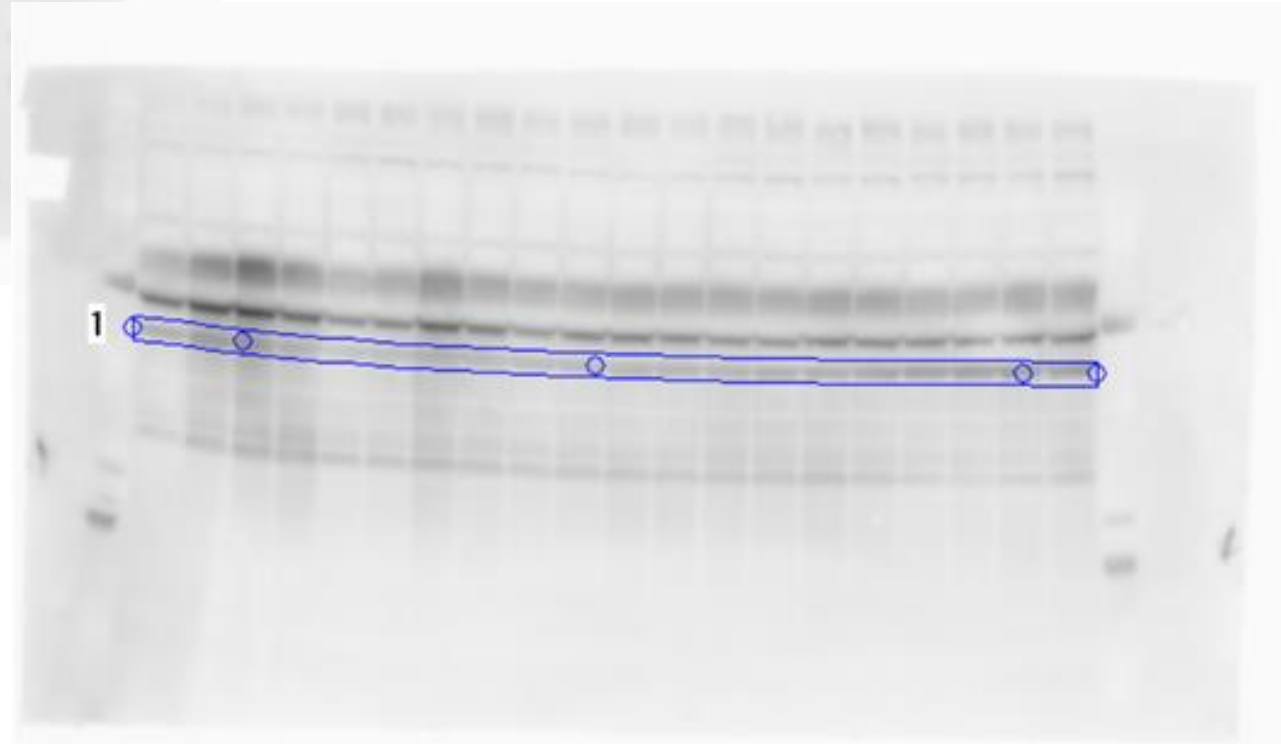

The bands from the left: Wistar, WKY, Wistar PTU, WKY PTU, Wistar, WKY, Wistar PTU, WKY PTU, Wistar, WKY, Wistar PTU, WKY PTU, Wistar, WKY, Wistar PTU, WKY PTU

# p-CREB

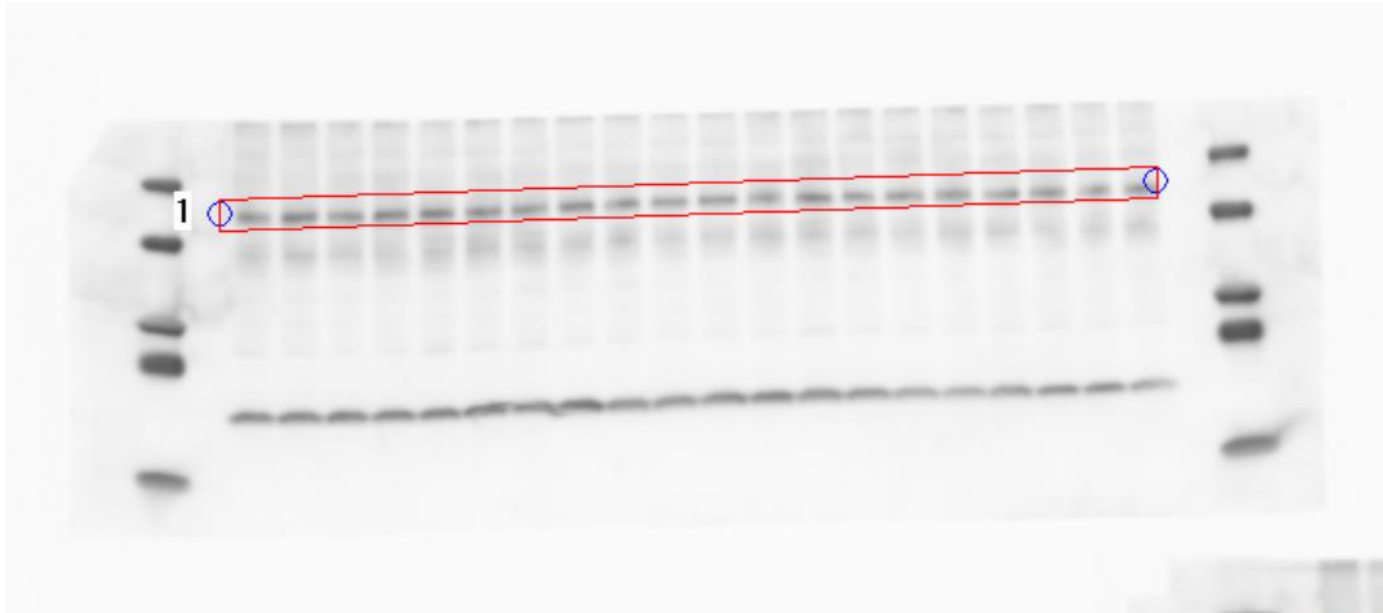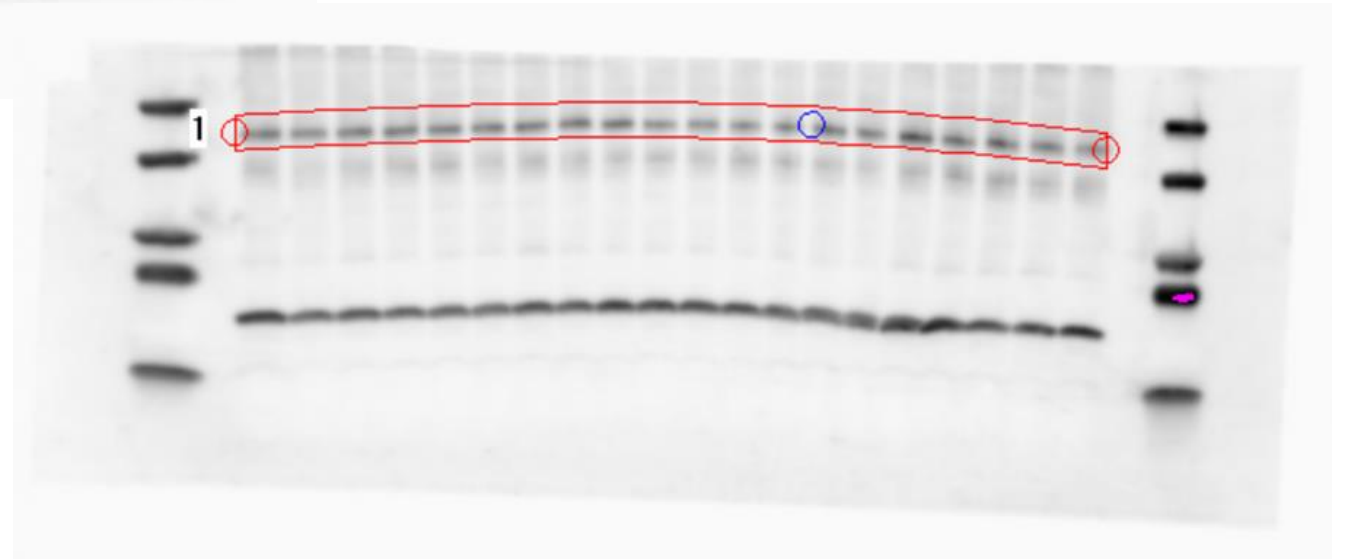

The bands from the left: Wistar, WKY, Wistar PTU, WKY PTU, Wistar, WKY, Wistar PTU, WKY PTU, Wistar, WKY, Wistar PTU, WKY PTU, Wistar, WKY, Wistar PTU, WKY PTU

## CREB

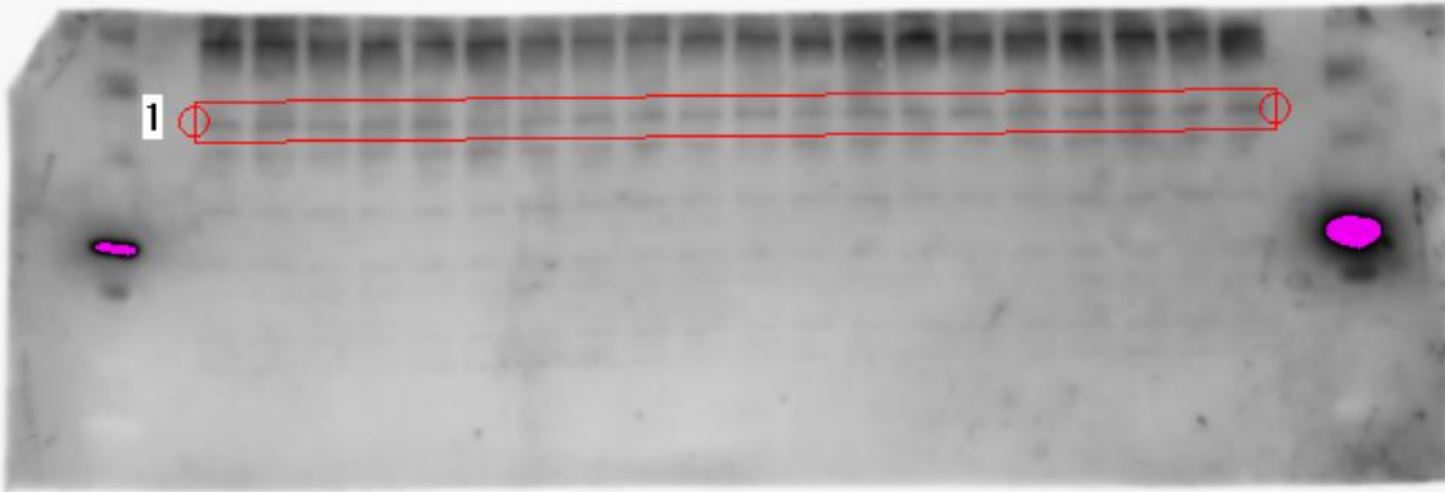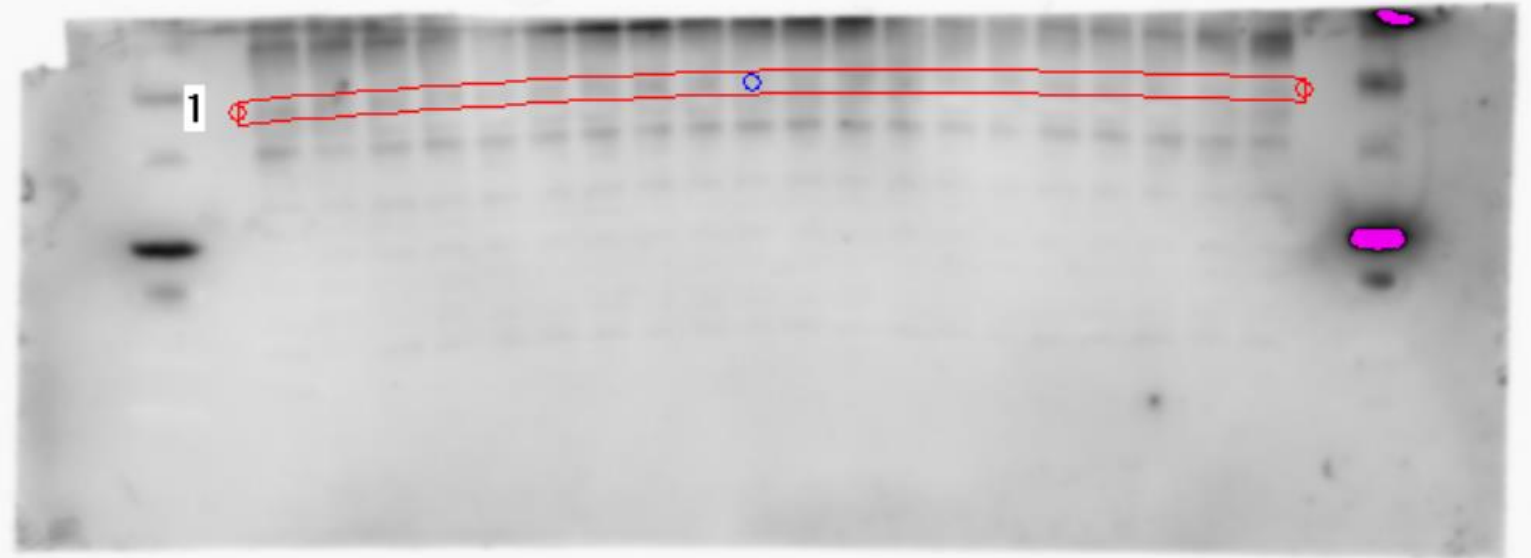

The bands from the left: Wistar, WKY, Wistar PTU, WKY PTU, Wistar, WKY, Wistar PTU, WKY PTU, Wistar, WKY, Wistar PTU, WKY PTU, Wistar, WKY, Wistar PTU, WKY PTU

$\beta$ -actin (as loading control) to p-CREB and CREB proteins

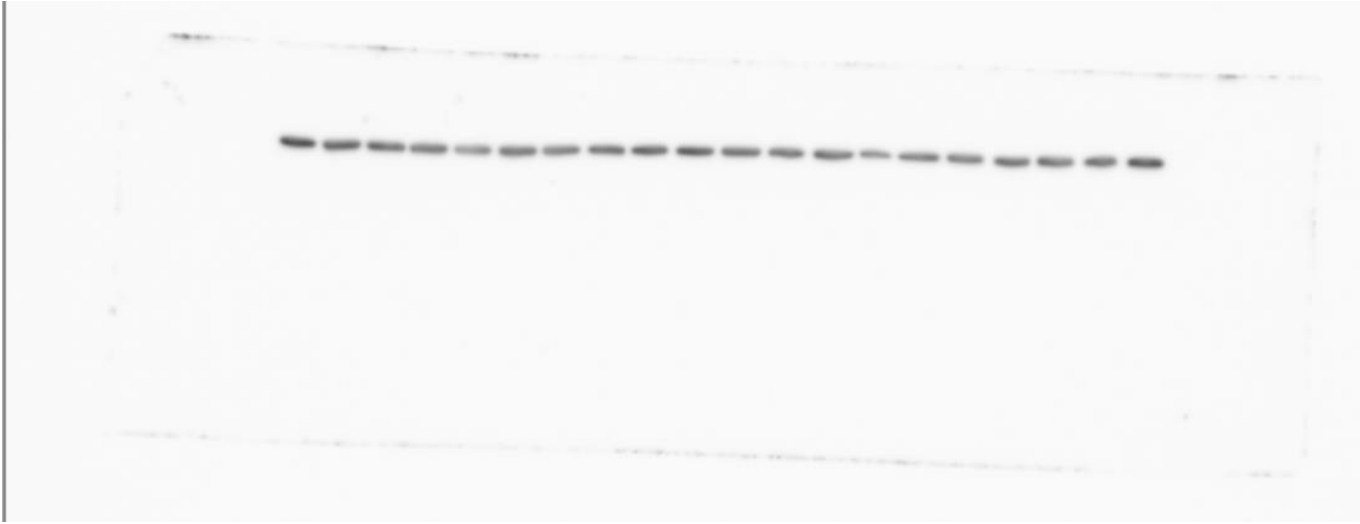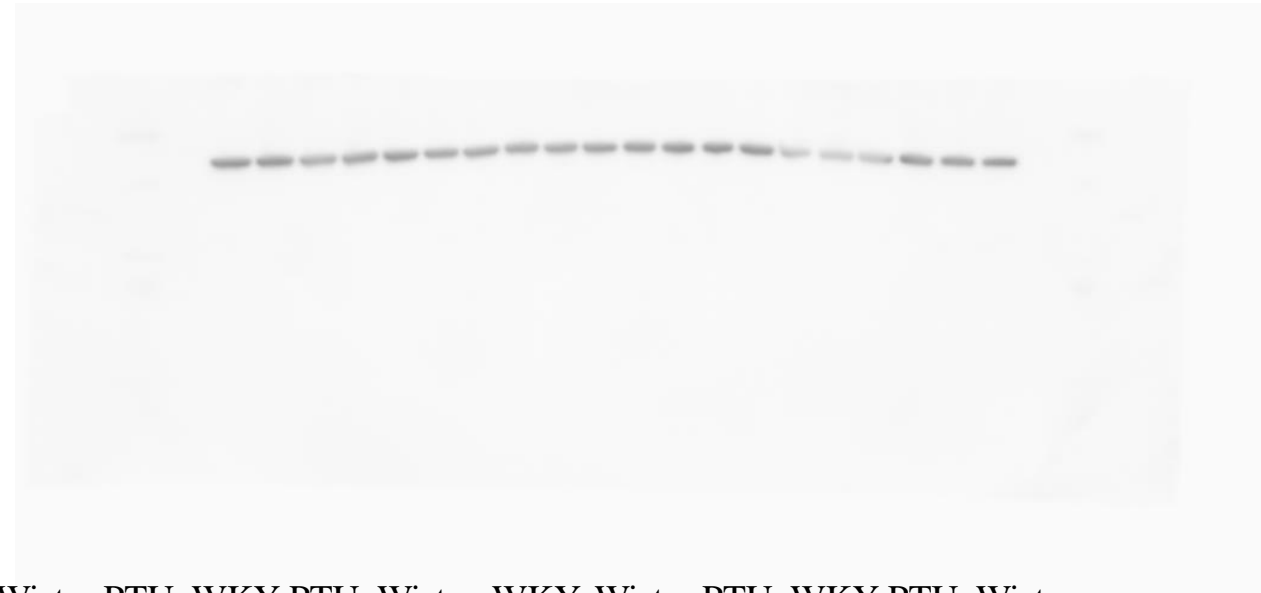

The bands from the left: Wistar, WKY, Wistar PTU, WKY PTU, Wistar, WKY, Wistar PTU, WKY PTU, Wistar, WKY, Wistar PTU, WKY PTU, Wistar, WKY, Wistar PTU, WKY PTU

p-ERK1

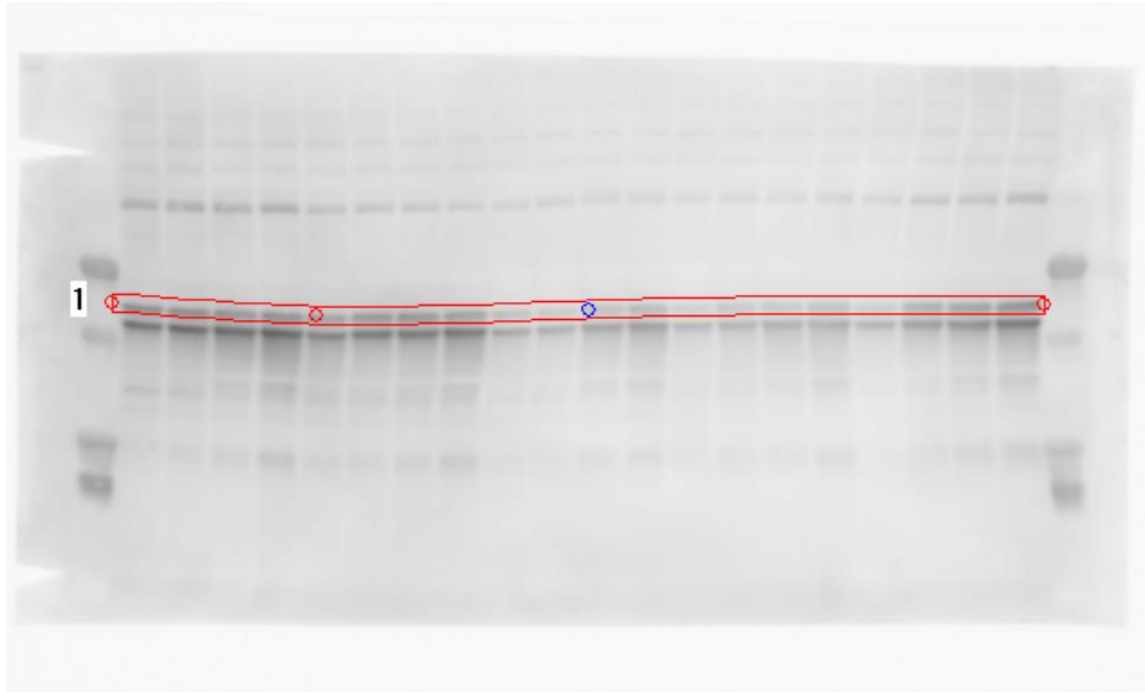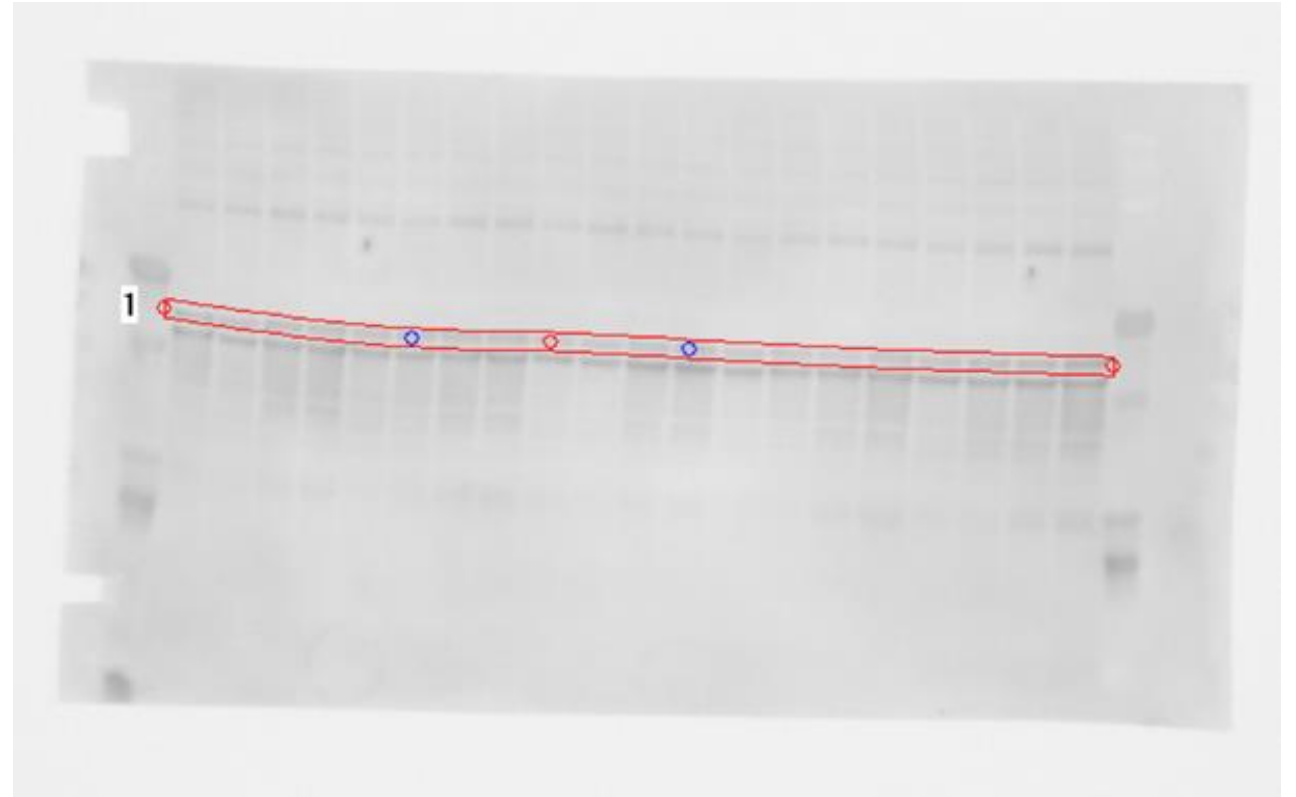

The bands from the left: Wistar, WKY, Wistar PTU, WKY PTU, Wistar, WKY, Wistar PTU, WKY PTU, Wistar, WKY, Wistar PTU, WKY PTU, Wistar, WKY, Wistar PTU, WKY PTU

# ERK1

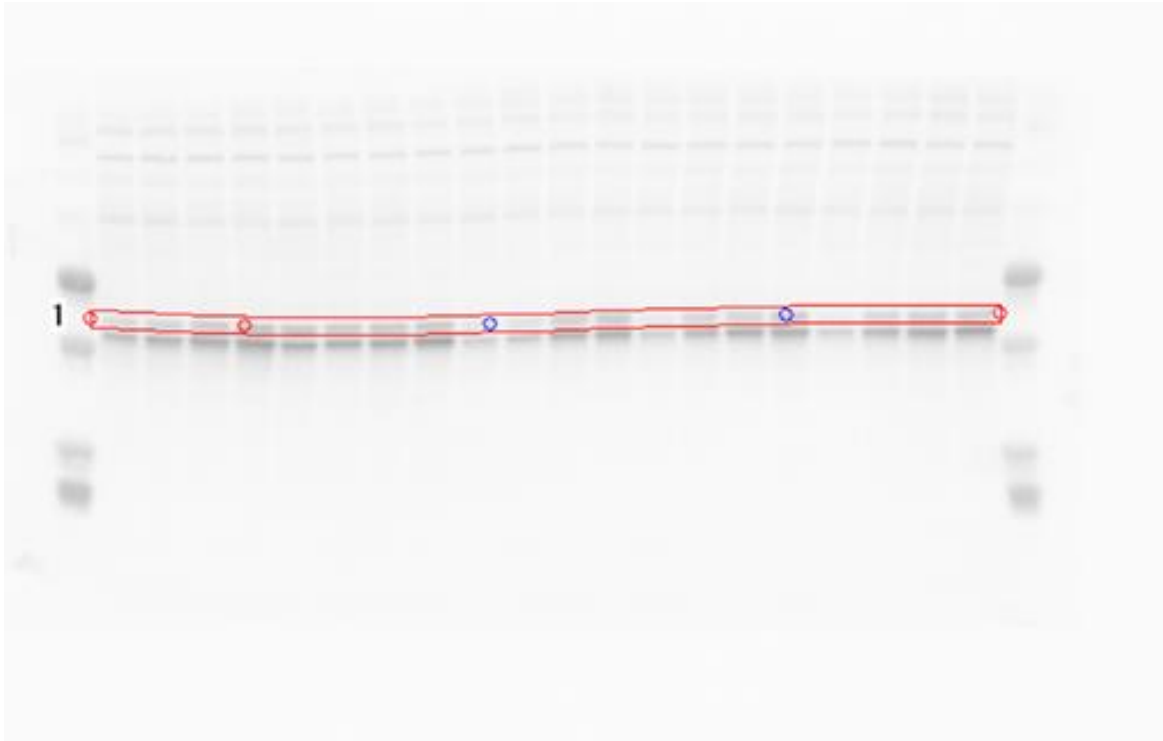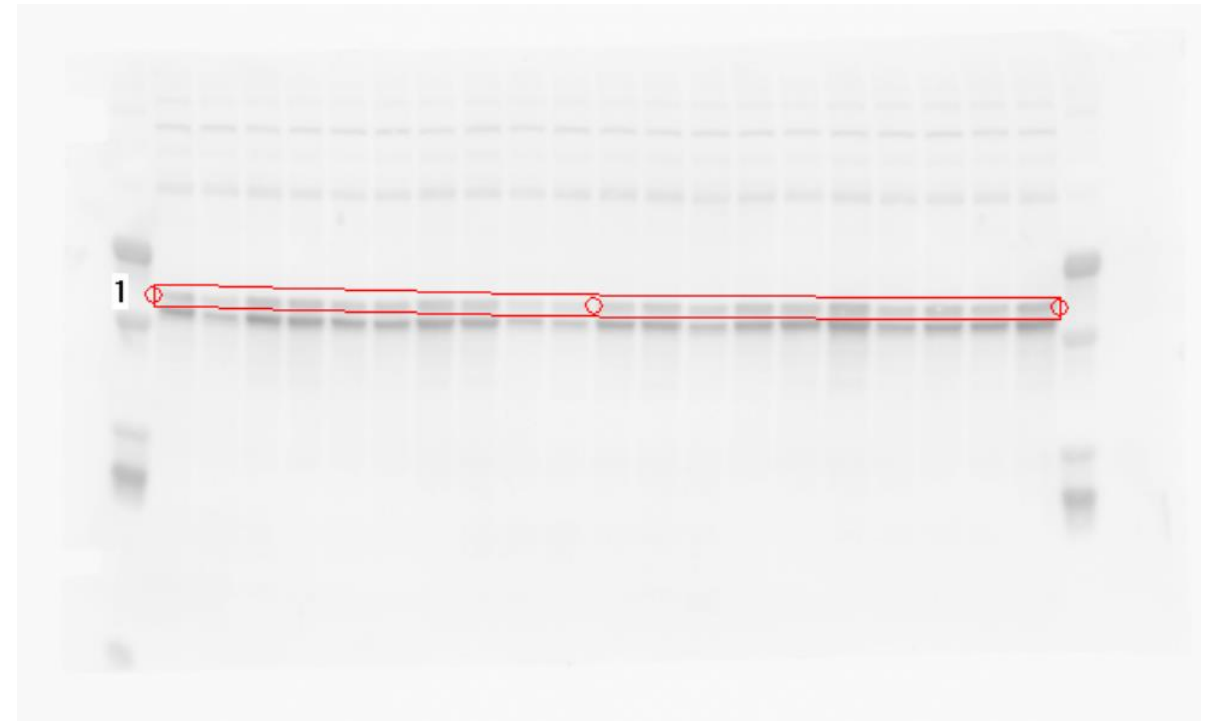

The bands from the left: Wistar, WKY, Wistar PTU, WKY PTU, Wistar, WKY, Wistar PTU, WKY PTU, Wistar, WKY, Wistar PTU, WKY PTU, Wistar, WKY, Wistar PTU, WKY PTU



## p-ERK2

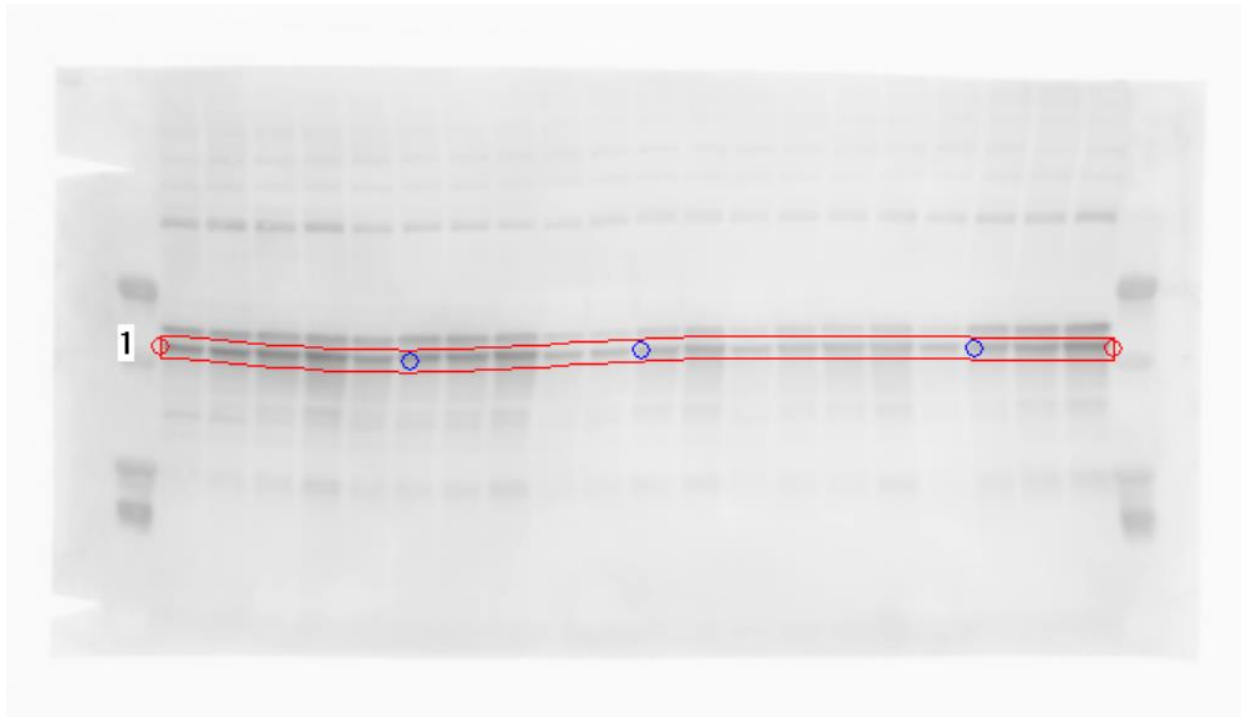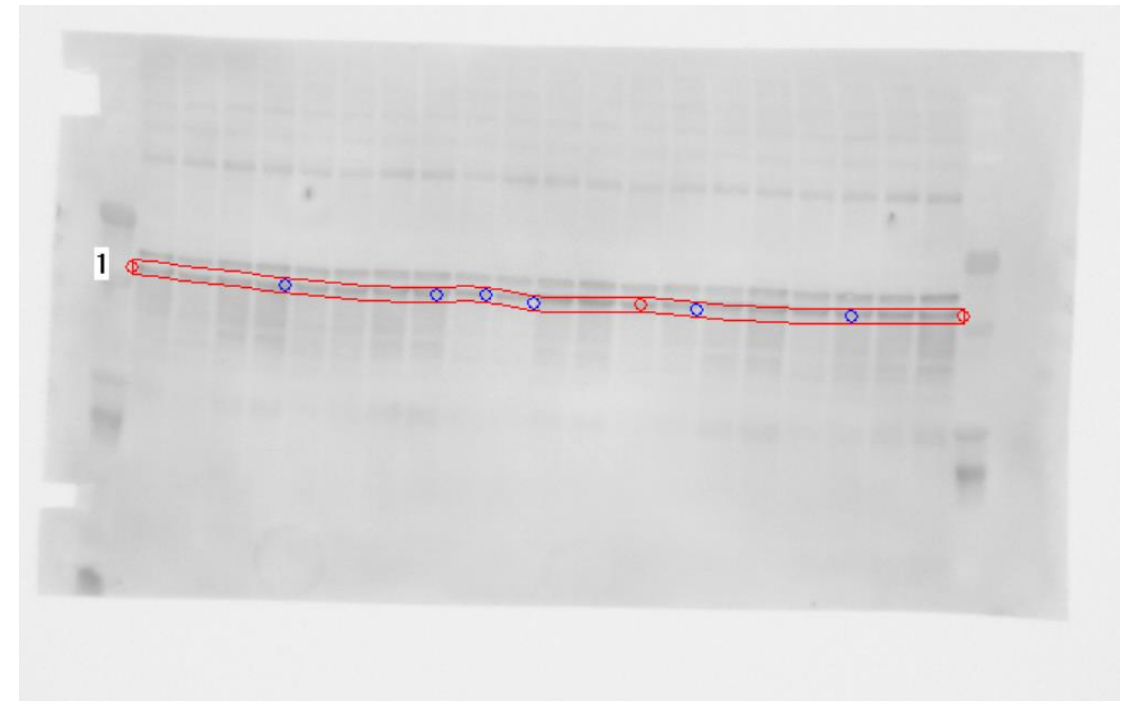

The bands from the left: Wistar, WKY, Wistar PTU, WKY PTU, Wistar, WKY, Wistar PTU, WKY PTU, Wistar, WKY, Wistar PTU, WKY PTU, Wistar, WKY, Wistar PTU, WKY PTU

## ERK2

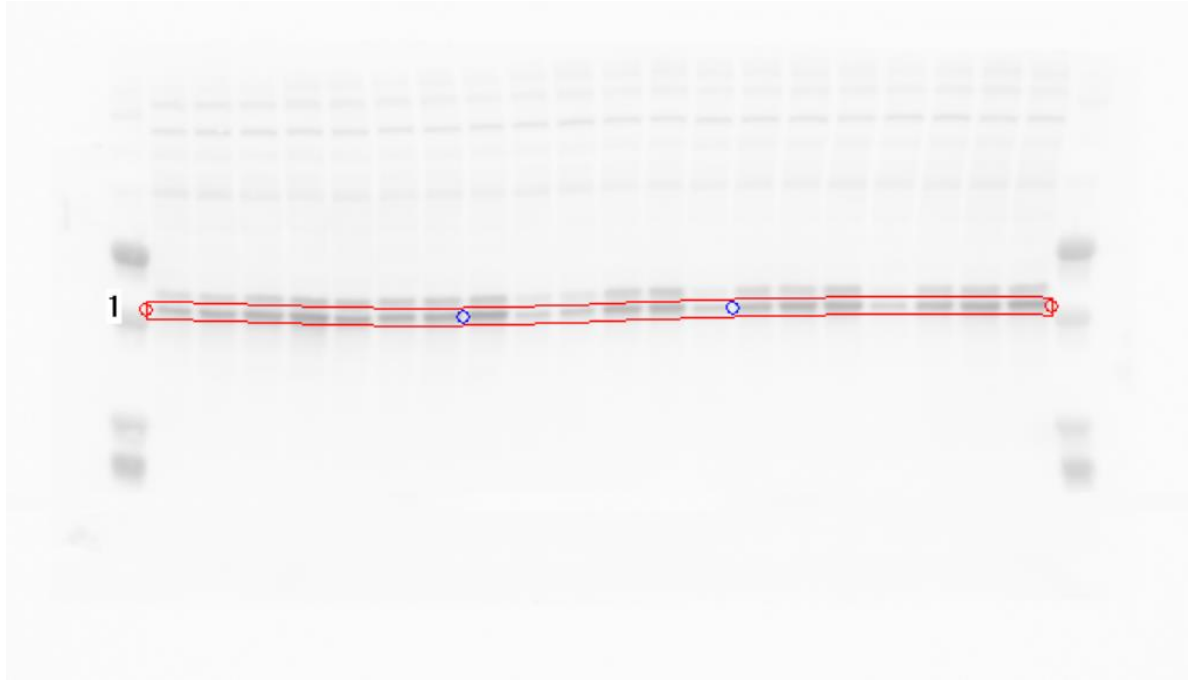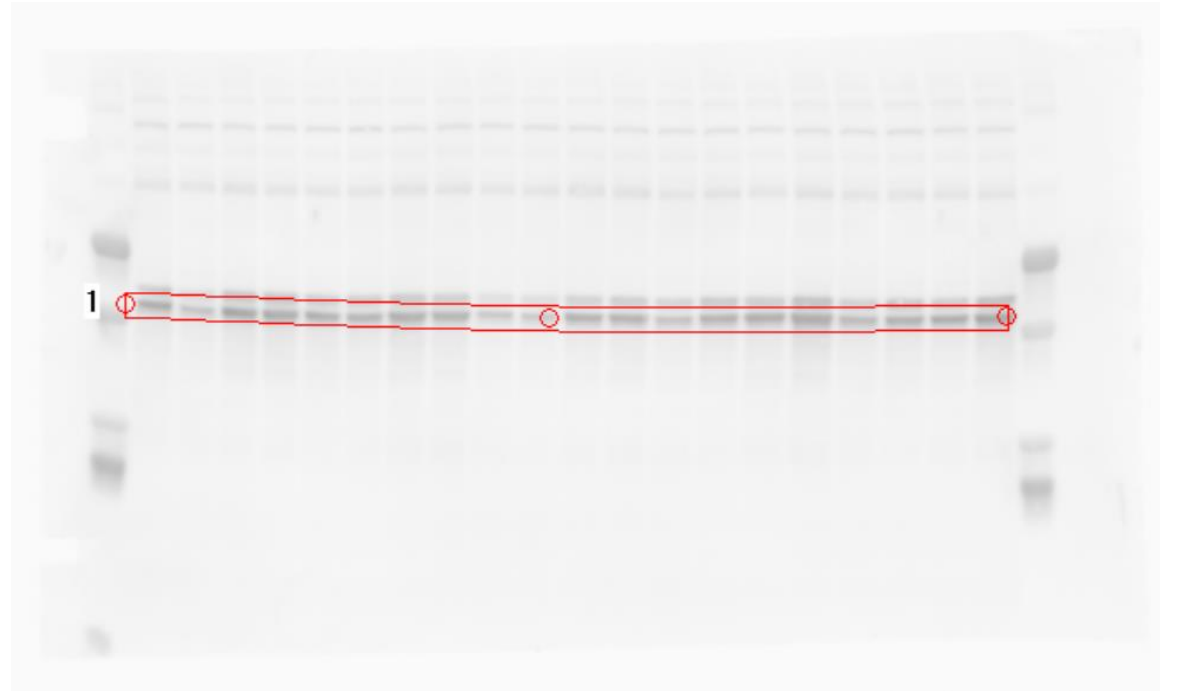

The bands from the left: Wistar, WKY, Wistar PTU, WKY PTU, Wistar, WKY, Wistar PTU, WKY PTU, Wistar, WKY, Wistar PTU, WKY PTU, Wistar, WKY, Wistar PTU, WKY PTU

$\beta$ -actin (as loading control) to p-ERK1, p-ERK2 and total ERK-1 and ERK-2 proteins

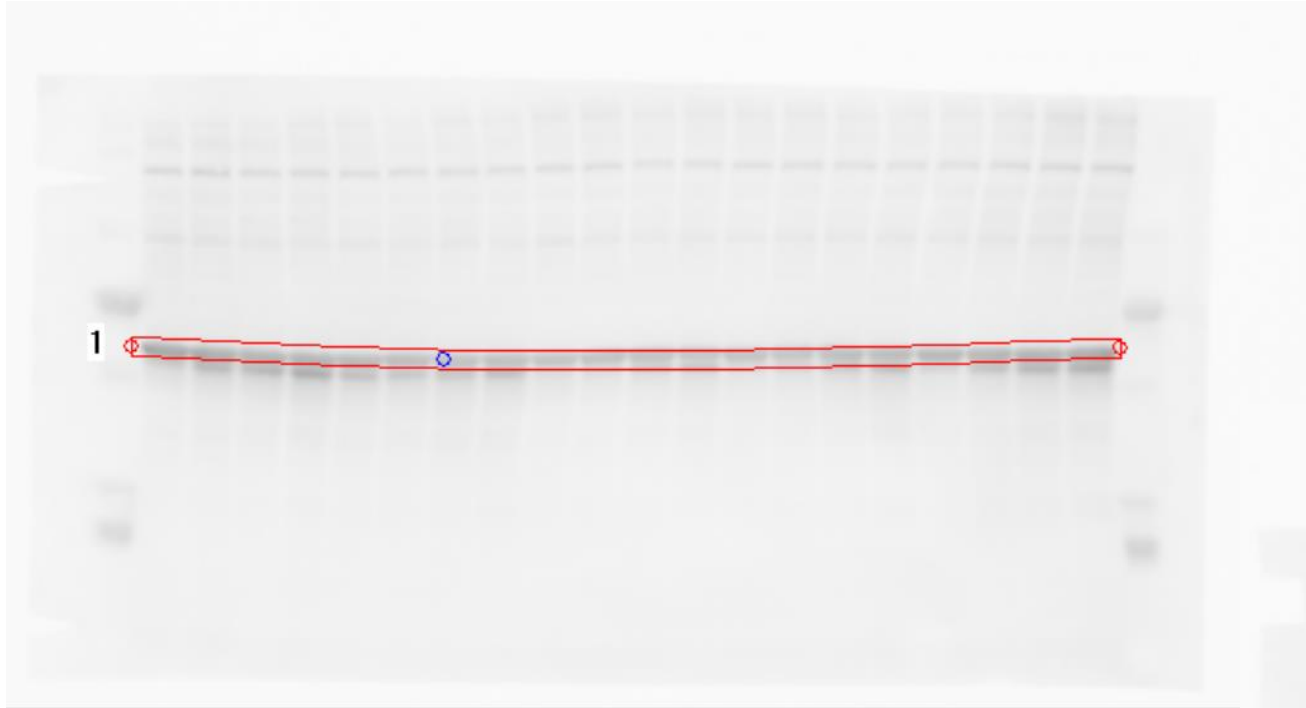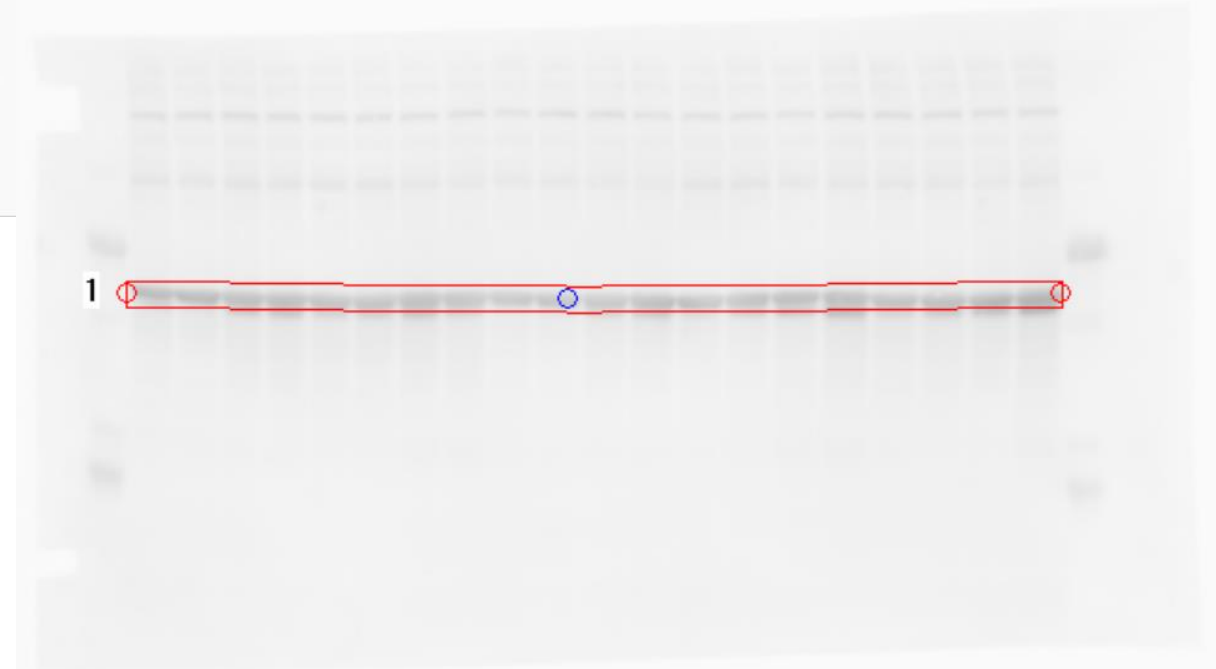

The bands from the left: Wistar, WKY, Wistar PTU, WKY PTU, Wistar, WKY, Wistar PTU, WKY PTU, Wistar, WKY, Wistar PTU, WKY PTU, Wistar, WKY, Wistar PTU, WKY PTU

not all samples (presented on pages 1-19) were analyzed (poor quality or outliers were not analyzed)
